# Supplementary material for: Cobomarsen, an Oligonucleotide Inhibitor of miR-155, Slows DLBCL Tumor Cell Growth In Vitro and In Vivo
Source: Oxford University Press journal article supplement (doi:10.1158/1078-0432.ccr-20-3139), 2020-11-18

**Supplementary figure 1: MiR-155 expression in GC- and ABC-subtype DLBCL cell lines, compared to CD19+B cells derived from healthy individuals.**

Expression of miR-155 was assessed by qRT-PCRandnormalized to the *RNU6* housekeeping gene. MiR-155 expression was lower in GC-DLBCL cell lines: TOLEDO, K422 and SUDHL5 comparing to ABC-DLBCL cell lines. Statistical analysis was performed one-way ANOVA, Dunnett’s multiple comparison test between the mean of miR-155 expression in each cell line with the mean of the control CD19+B cells, ****p<0.0001. Fold change represent the average (± standard deviation, SD) of three independent experiments, each performed in technical triplicates.


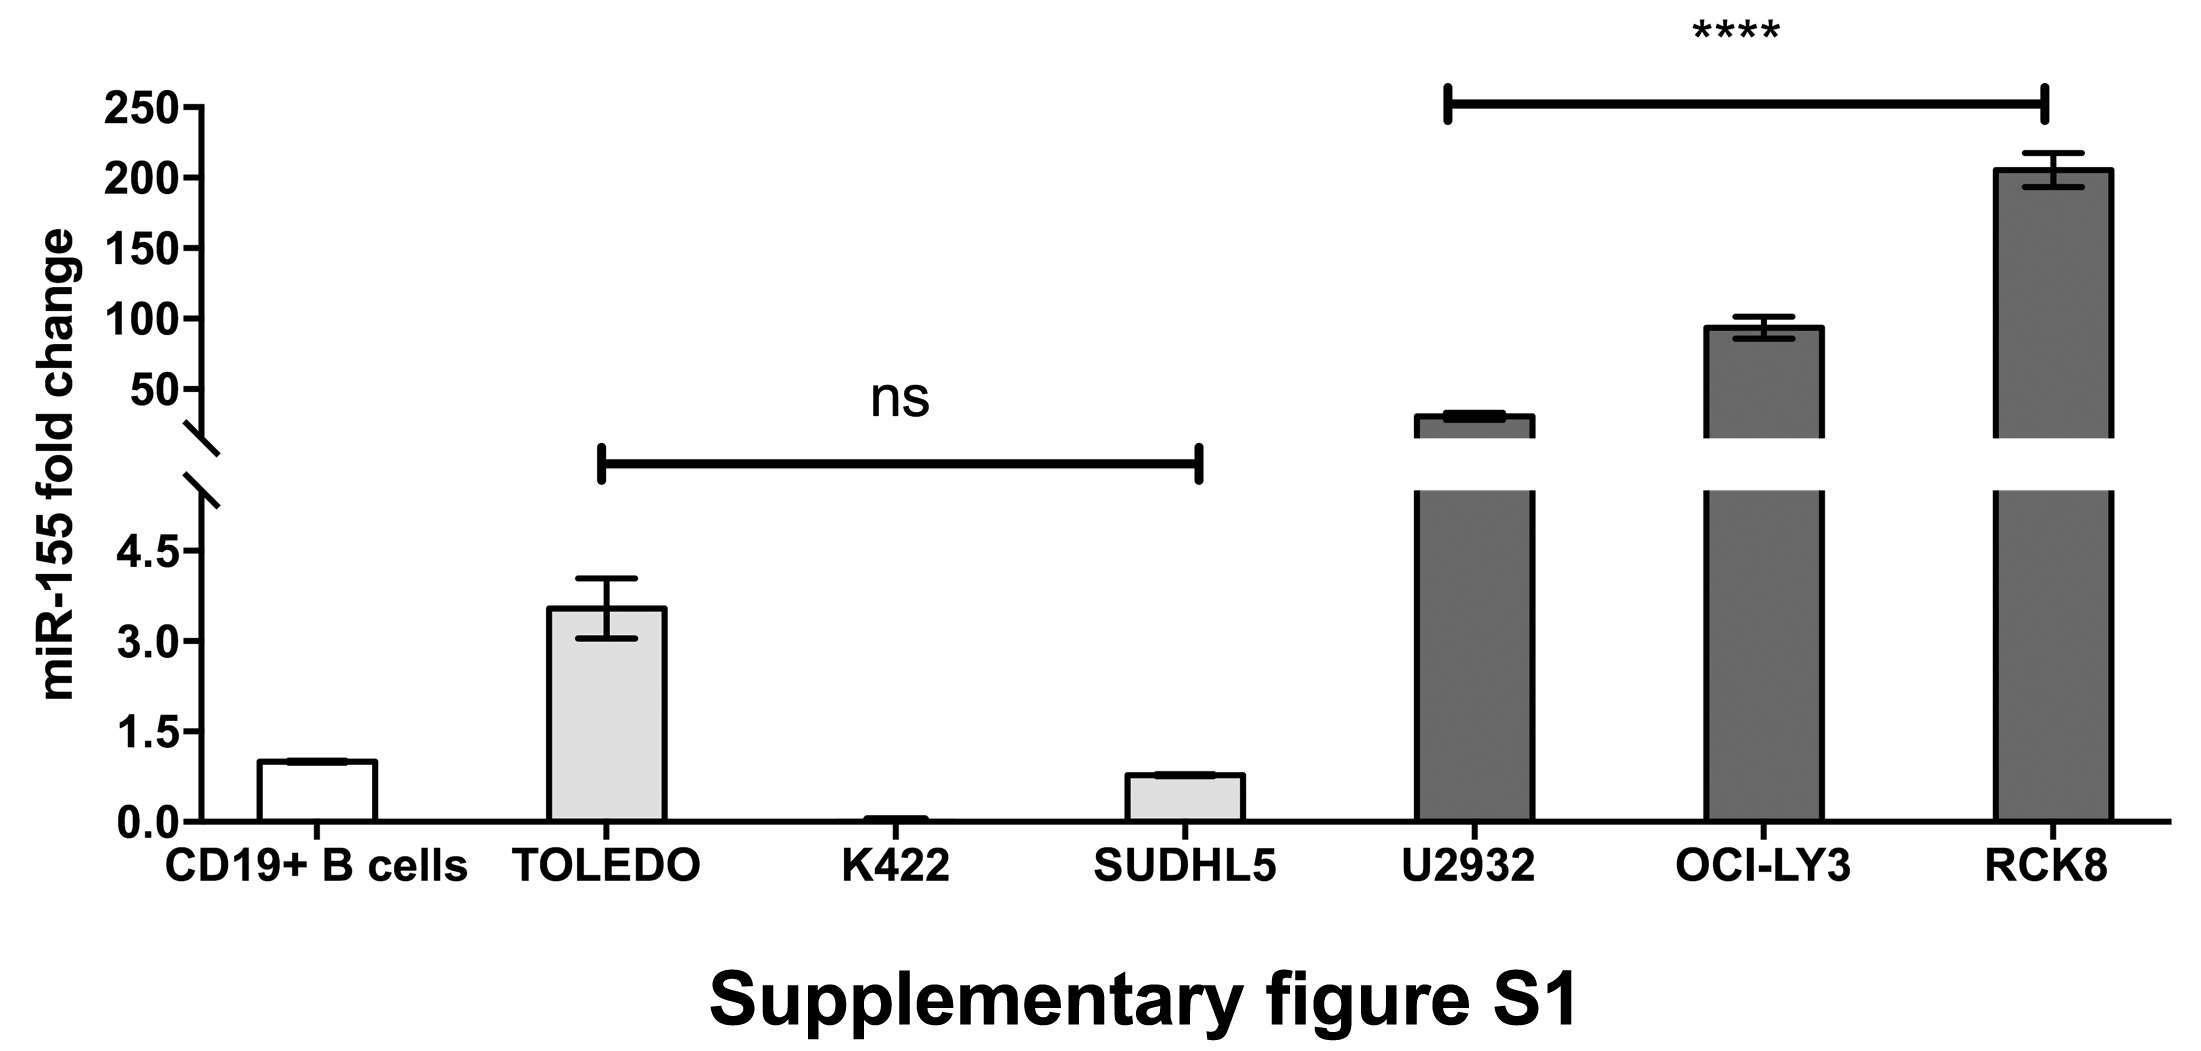

Supplement: 10780432ccr203139-sup-249099_2_supp_6707263_qjh9cz.docx [file 10780432ccr203139-sup-249099_2_supp_6707263_qjh9cz.docx]
