# Supplementary material for: Cobomarsen, an Oligonucleotide Inhibitor of miR-155, Slows DLBCL Tumor Cell Growth In Vitro and In Vivo
Source: Oxford University Press journal article supplement (doi:10.1158/1078-0432.ccr-20-3139), 2020-11-18
Supplement: 10780432ccr203139-sup-249099_2_supp_6707264_qjh9cz.docx [file 10780432ccr203139-sup-249099_2_supp_6707264_qjh9cz.docx]

**
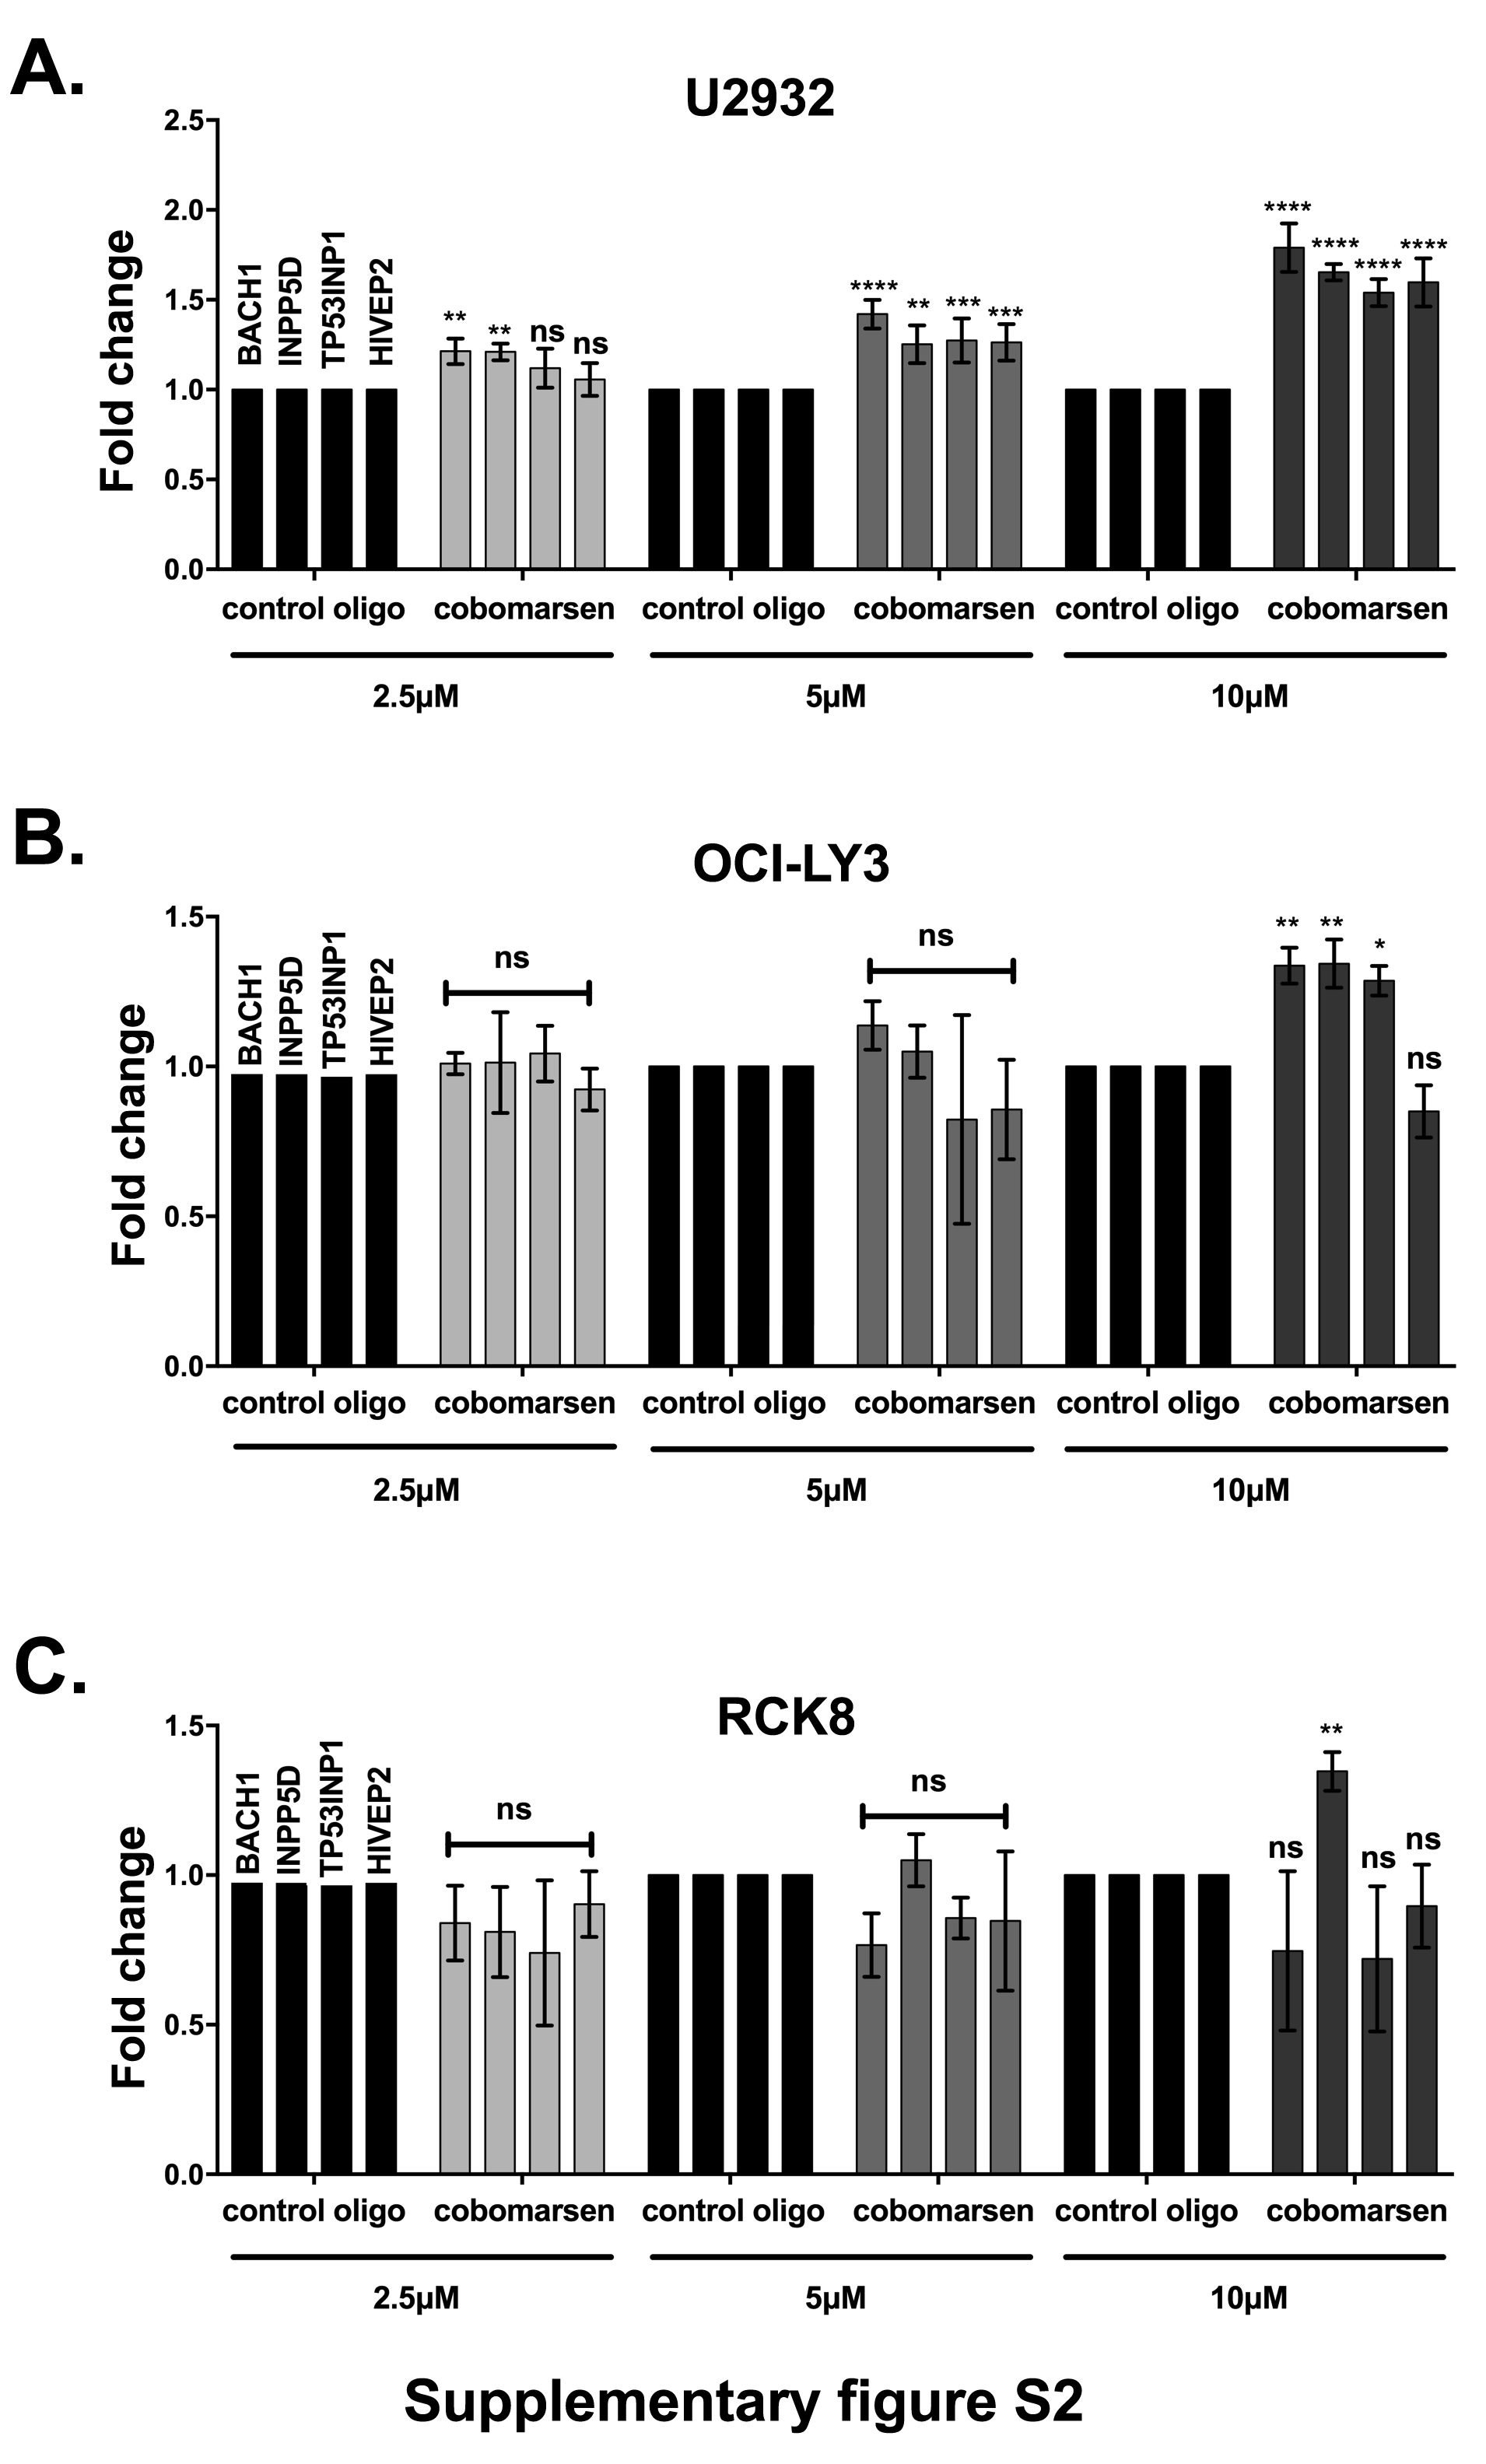
Supplementary figure 2: Functional uptake of three different doses of cobomarsen in ABC-DLBCL cell lines.**

Cells were treated for 96h with 2.5μM, 5μMand 10μMcobomarsenandoligonucleotide control. The graphs show changes in the expression of miR-155 target genes, *BACH1, INPP5D, TP53INP1* and *HIVEP2* assessed by qRT-PCR and each gene was normalized to *GAPDH*. Each bar represents the mean change in expression of four miR-155 direct target genes by three different concentrations of cobomarsen relative to the oligonucleotide treated cells in **A. U2932, B. OCI-LY3 and C. RCK8.** Results are the meanof three biological replicates (±SD). Statistical analysis was performed by 2-way ANOVA, Tukey’s multiple comparisons between the mean of three biological replicates treated with cobomarsen versus the oligonucleotide control for each indicated concentration. :**p<0.01, ***p<0.001 and ****p<0.0001.
